# Supplementary material for: The Elongation Factor GmEF4 Is Involved in the Response to Drought and Salt Tolerance in Soybean
Source: PubMed Central journal article supplement (PMC6627591; doi:10.3390/ijms20123001), 2019-06-19
Supplement: ijms-20-03001-s001.pdf [file ijms-20-03001-s001.pdf]

**Table S1:** Analysis datas of ten GmEF1 $\alpha$ s genes for heat map.

|        | young leaf | flower | one cm pod | pod shell 10DAF | pod shell 14DAF | seed 10DAF | seed 14DAF | seed 21DAF | seed 25DAF | seed 28DAF | seed 35DAF | seed 42DAF | root | nodule |
|--------|------------|--------|------------|-----------------|-----------------|------------|------------|------------|------------|------------|------------|------------|------|--------|
| GmEF1  | 36         | 41     | 36         | 39              | 37              | 20         | 13         | 12         | 23         | 26         | 32         | 8          | 28   | 27     |
| GmEF2  | 151        | 211    | 121        | 152             | 101             | 107        | 94         | 64         | 95         | 74         | 118        | 59         | 220  | 137    |
| GmEF3  | 7018       | 5629   | 8923       | 12365           | 7639            | 5485       | 7294       | 3076       | 9721       | 9849       | 14543      | 8396       | 9944 | 6251   |
| GmEF4  | 2173       | 1186   | 1717       | 2727            | 1831            | 1180       | 1932       | 1174       | 1891       | 1849       | 2156       | 1017       | 2512 | 2066   |
| GmEF5  | 3210       | 2101   | 3479       | 4499            | 2467            | 2384       | 2849       | 1293       | 2635       | 2545       | 3982       | 2180       | 3319 | 1494   |
| GmEF7  | 253        | 229    | 201        | 284             | 137             | 166        | 195        | 113        | 230        | 130        | 245        | 94         | 418  | 199    |
| GmEF8  | 2235       | 1811   | 2288       | 3031            | 2329            | 1441       | 1941       | 1222       | 1661       | 1515       | 1900       | 741        | 2360 | 2332   |
| GmEF9  | 134        | 277    | 142        | 200             | 64              | 118        | 290        | 105        | 418        | 298        | 555        | 185        | 1651 | 134    |
| GmEF10 | 72         | 115    | 81         | 138             | 117             | 50         | 124        | 38         | 93         | 87         | 132        | 77         | 165  | 174    |

**Table S2.** Primers used in the paper.

| Gene                  | Sequences                           |
|-----------------------|-------------------------------------|
| Soybean actin Forward | ACATTGTTCTTAGTGGTGGCT               |
| Soybean actin Reverse | CTGTTGGAAGGTGCTGAG                  |
| GmEF1 Forward         | GGTGGCATCCCCTTCTGATG                |
| GmEF1 Reverse         | AGCGTACTGTTCCCACAACA                |
| GmEF2 Forward         | TGGAACGGGCCTTGCTTATT                |
| GmEF2 Reverse         | CCTCACGAACACTGCCAGAT                |
| GmEF3 Forward         | GAAGCGTGGTTATGTTGCC                 |
| GmEF3 Reverse         | CCAATCTGACCAGGGTGG                  |
| GmEF4 Forward         | TGCCTGGGTGCTCGACAAGCTCAAA           |
| GmEF4 Reverse         | GTCCAGGAGCATCAATGACCGTGCA           |
| GmEF5 Forward         | GTAAGGAAAAGGTTACATCAGT              |
| GmEF5 Reverse         | CCCAGGCATACTTGAAAGAC                |
| GmEF6 Forward         | AGGAGCTCTTCGGAGTGGAT                |
| GmEF6 Reverse         | TGTGCCACCAATATGGGAC                 |
| GmEF7 Forward         | GTTCCACTGCGAGATCCCAA                |
| GmEF7 Reverse         | CCTCACGAACACTGCCAGAT                |
| GmEF8 Forward         | GGCTGATTGTGCTGTCCTT                 |
| GmEF8 Reverse         | GGTAGTGGCATCCATCTTGTTA              |
| GmEF9 Forward         | TCAAGCGTGGTTTTGTGCG                 |
| GmEF9 Reverse         | ATGTGGGAGGTGTGGCAATC                |
| GmEF10 Forward        | ATGAGCCCAAGAGACCCTCA                |
| GmEF10 Reverse        | CCATACCGGGCTTCAAGACA                |
| GmEF4-3301 Forward    | GGACTCTTGACCATGATGGGTAAGGAAAAGGTTC  |
| GmEF4-3301 Reverse    | ATTCGAGCTGGTCACCCTTCTTCTTGGCGGCAG   |
| GmEF4-GFP Forward     | GCCCAGATCAACTAGTATGGGTAAGGAAAAGGTTC |
| GmEF4-GFP Reverse     | TCGAGACGTCTCTAGACTTCTTCTTGGCGGCAG   |

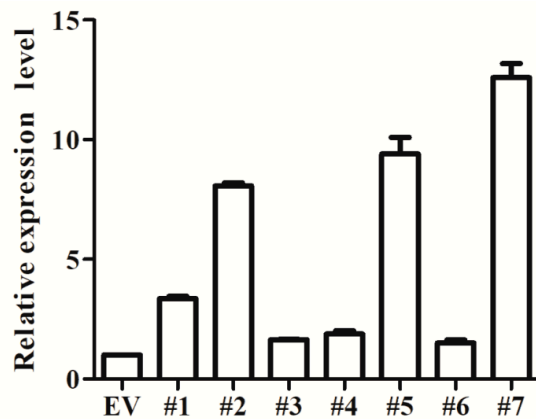

**Figure S1.** qRT-PCR analyses of GmEF4 expression in GmEF4-OE and EV-control transgenic soybean hairy roots.
